# Supplementary material
Source: Springer Nature journal article supplement (https://www.springermedizin.de/resource/supplementary/13058_2012_3052_MOESM7_ESM.pdf/9703162)

**A** MCF-10A

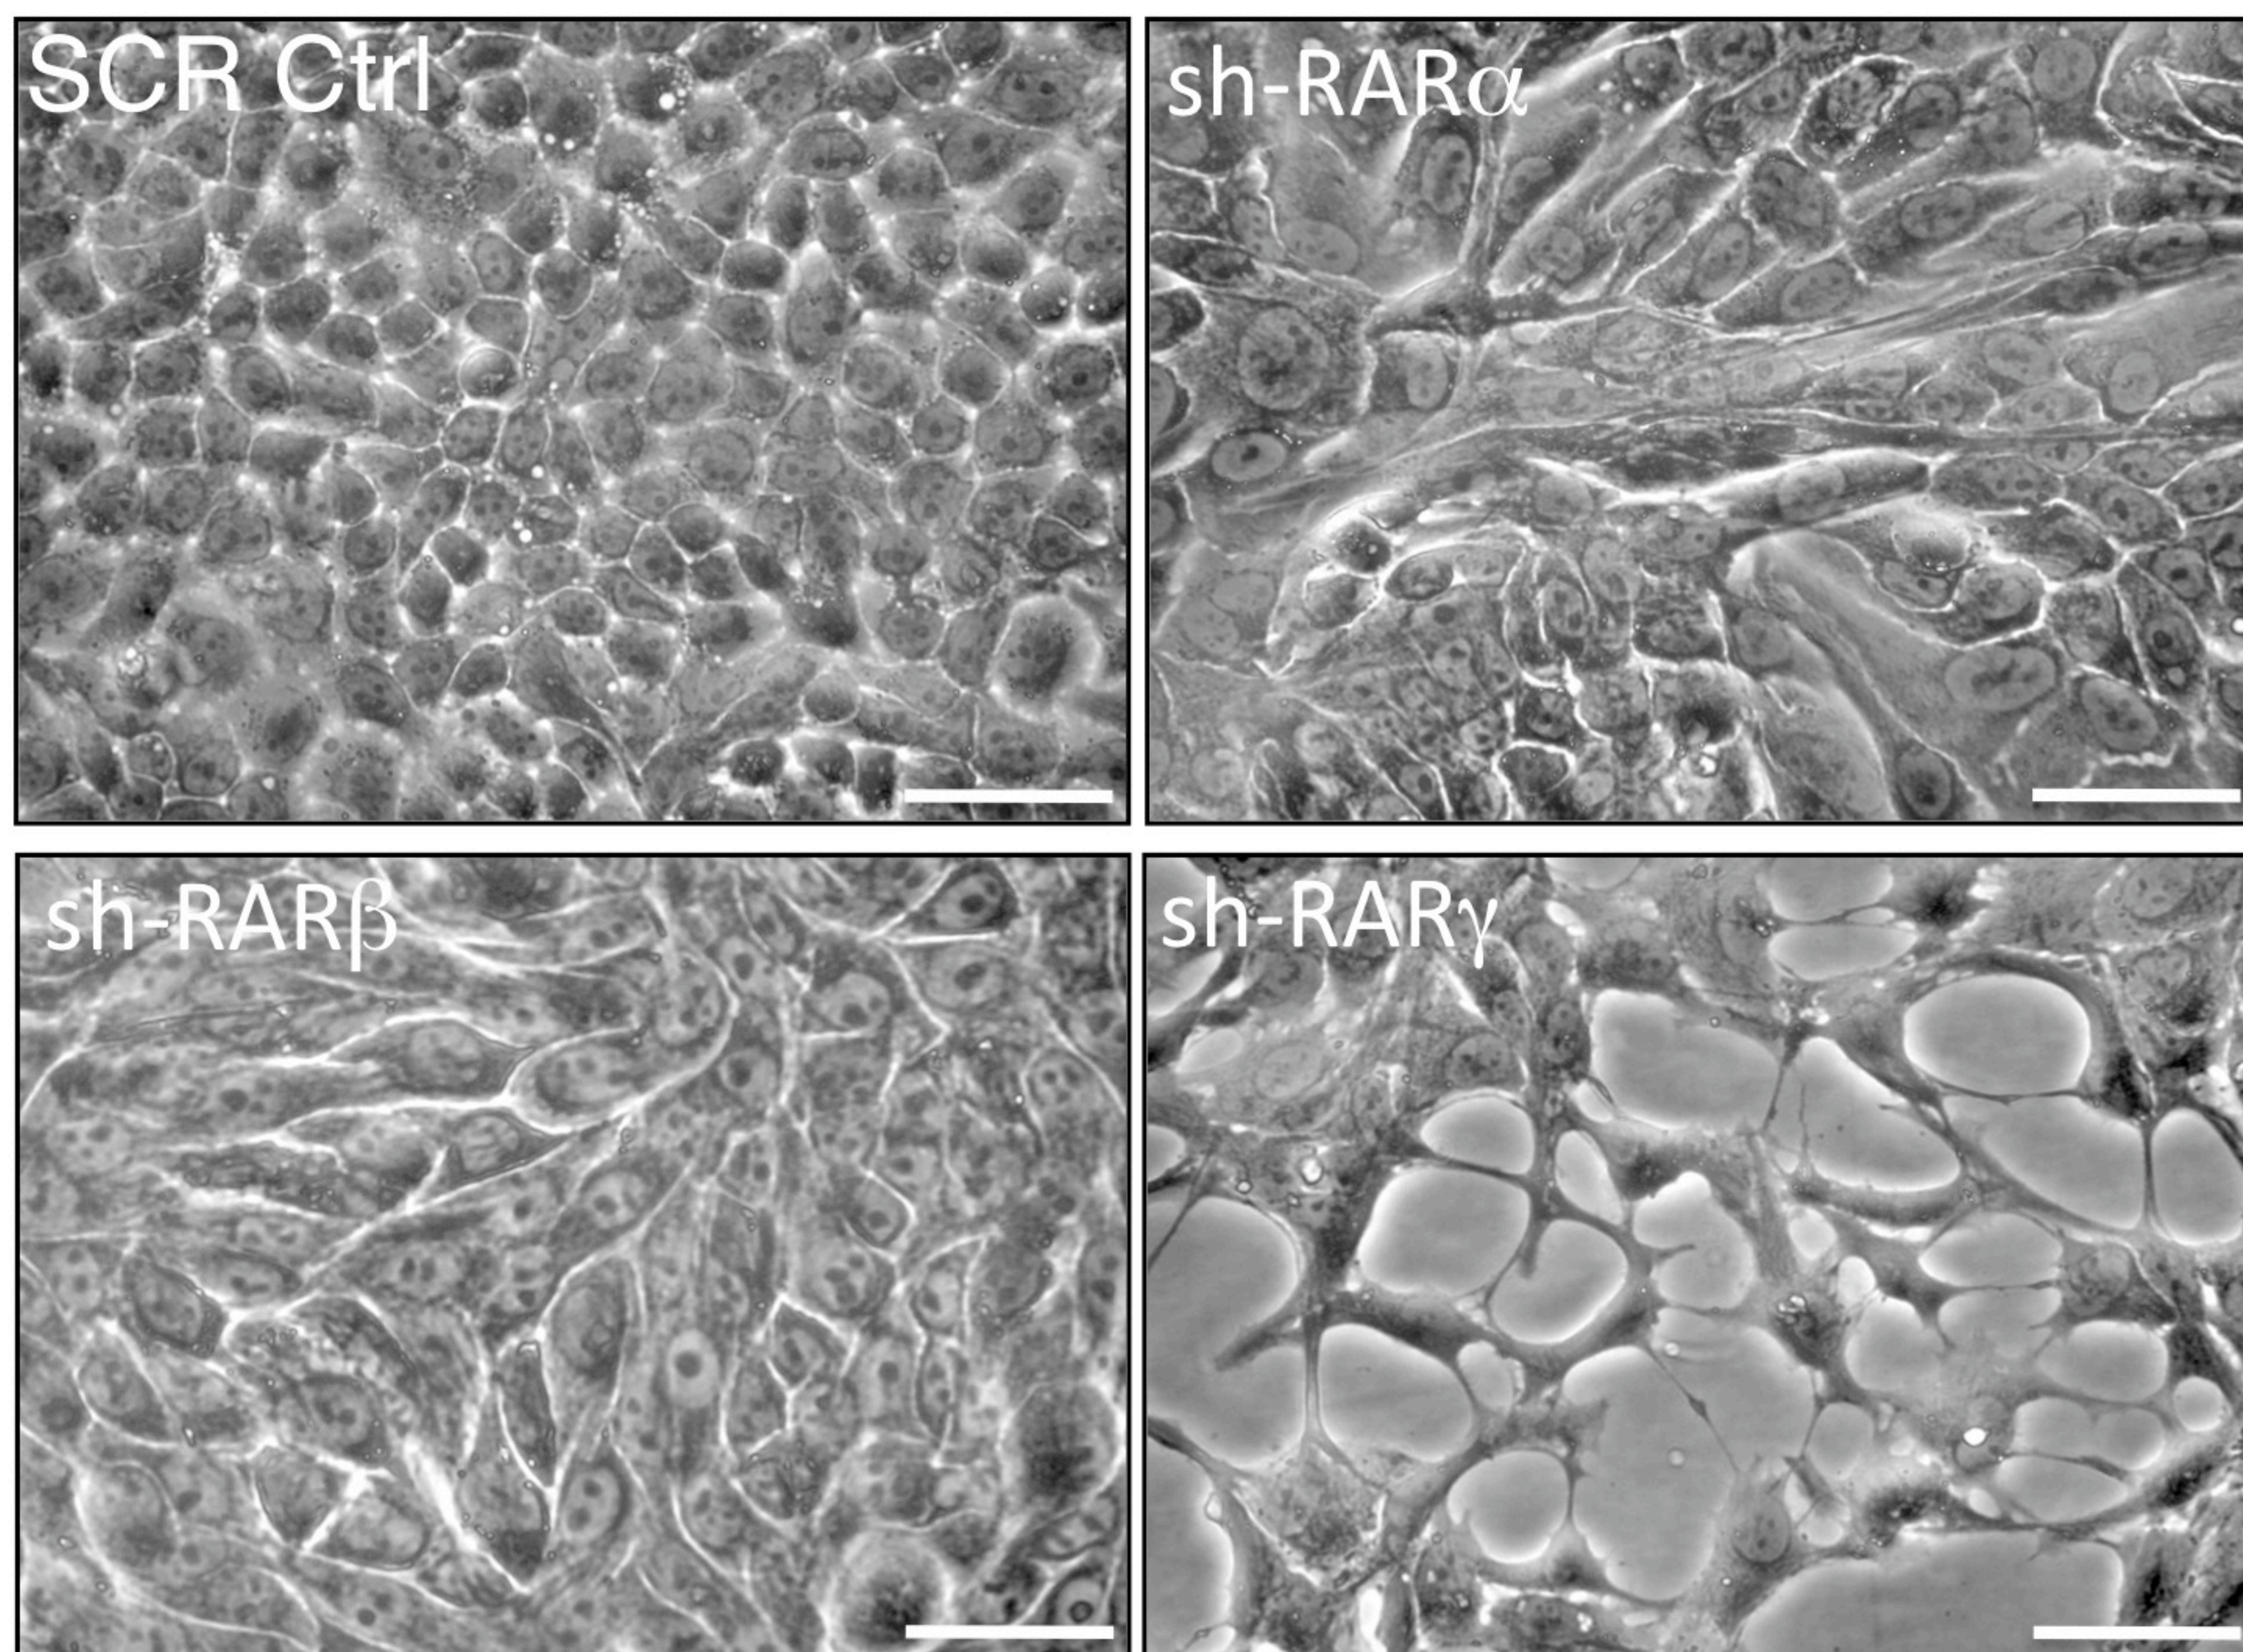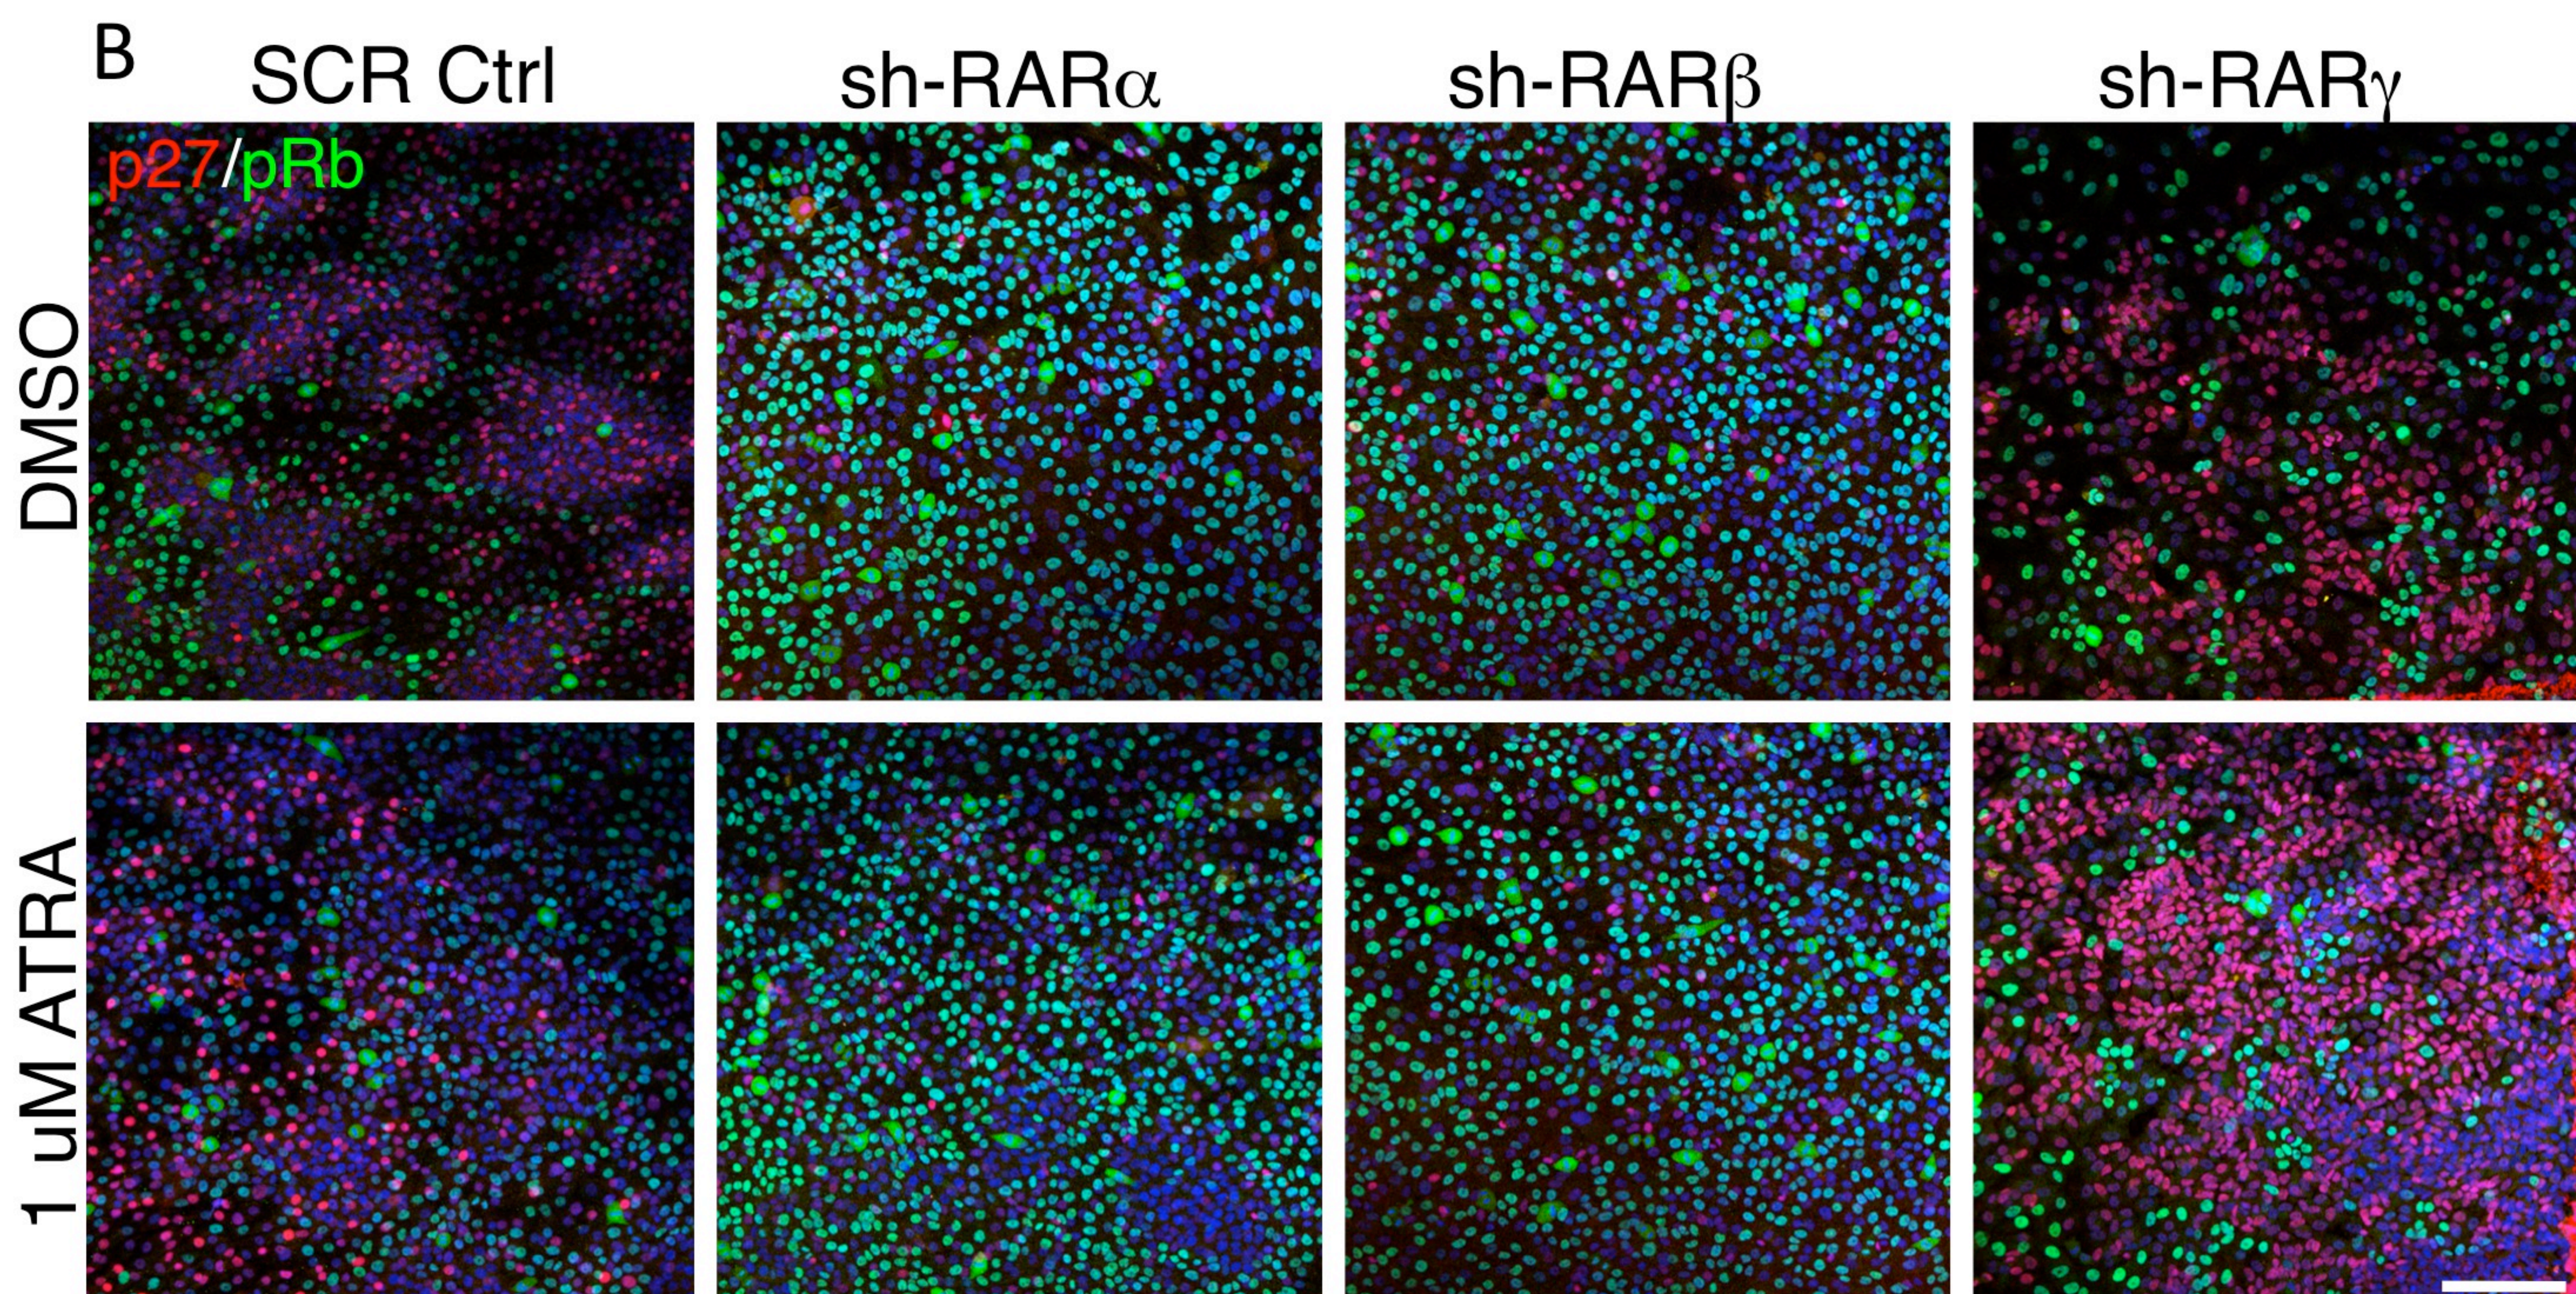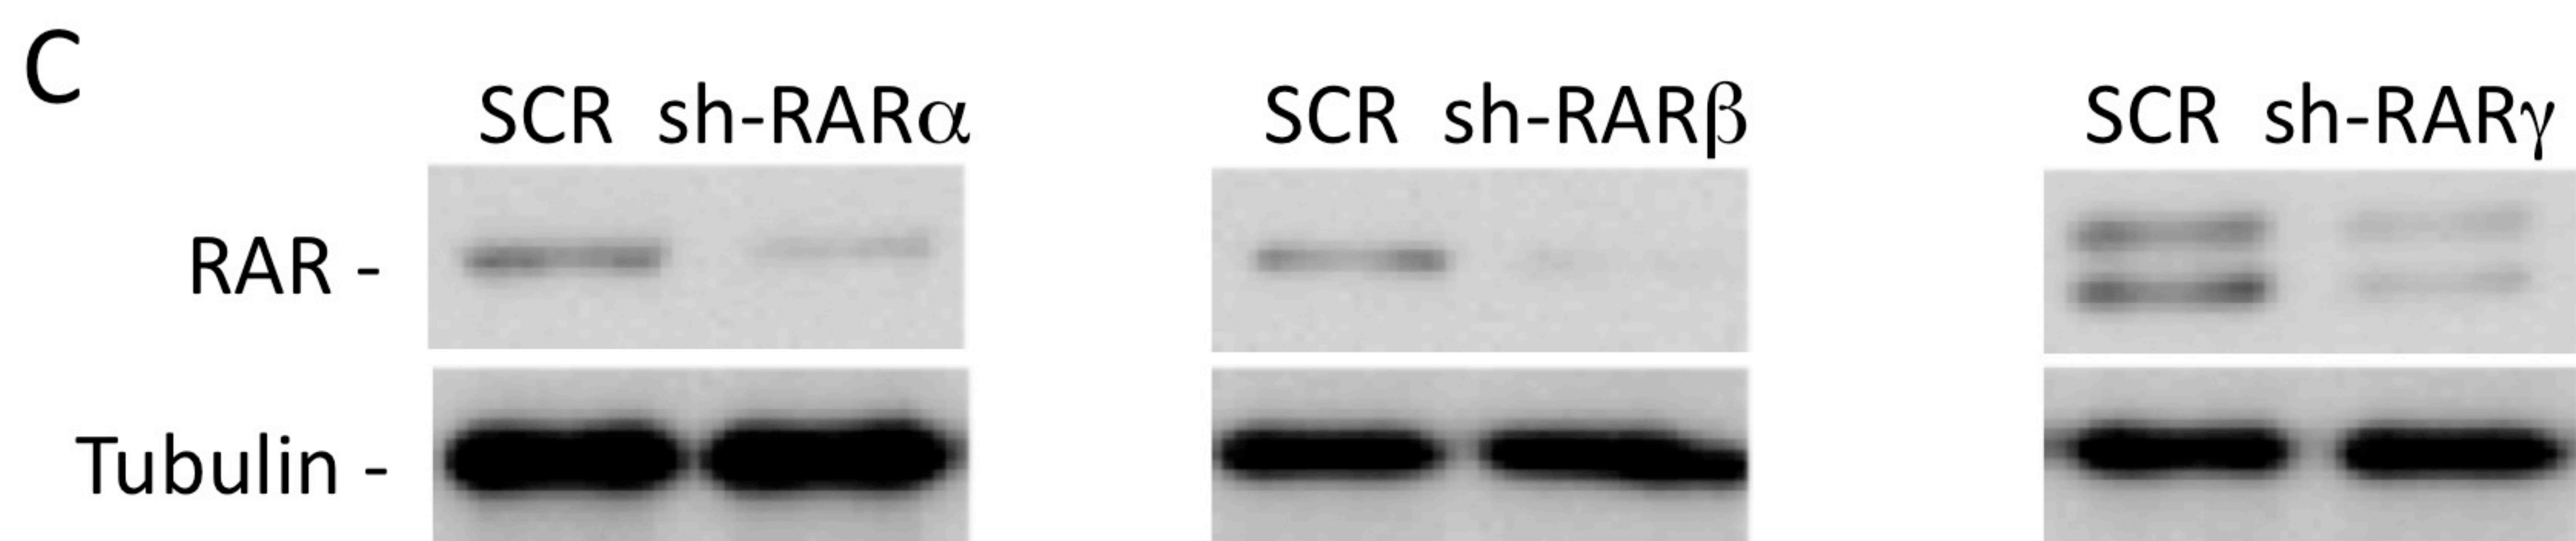

Supplement: MOESM7 [file 9703162]
